# Supplementary material
Source: PubMed Central journal article supplement (PMC4746607)
Supplement: cr201615x1.pdf [file cr201615x1.pdf]

**A**

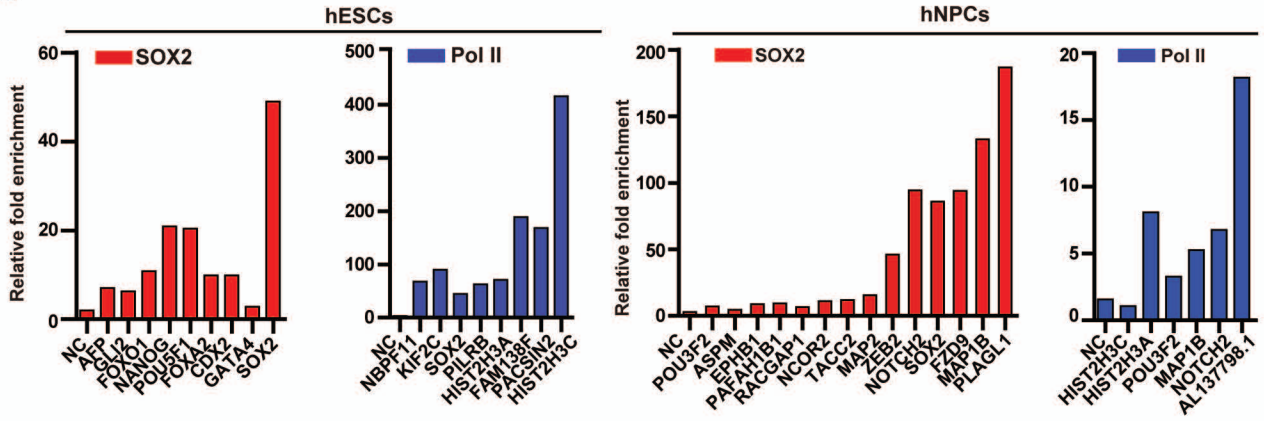

**B**

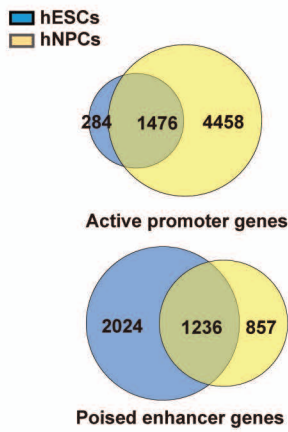

**C**

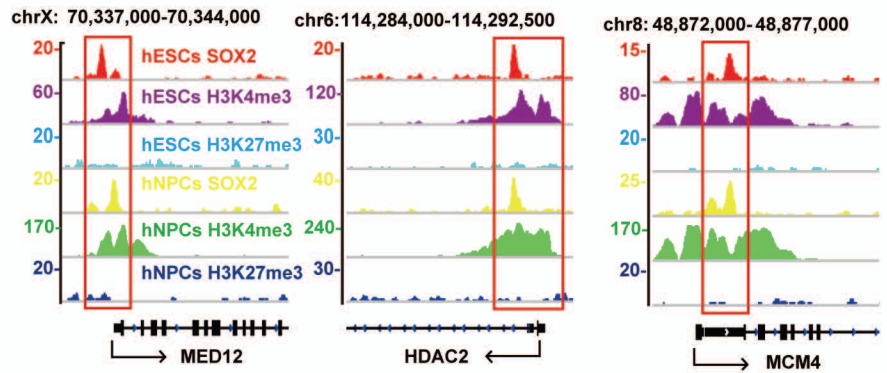

**Figure S1. SOX2 binds to genes involved in diverse aspects of hESCs and hNPCs maintenance. Related to Figure 1.**

(A) ChIP-qPCR verification of SOX2 enrichments at randomly selected peaks from the SOX2 and Pol II ChIP-seq result of in hESCs and hNPCs, respectively. Selected peaks include peaks with both high and low enrichment scores by MACS results.

(B) Venn diagrams showing the overlap status of active promoter bound genes and poised enhancer bound genes in hESCs and hNPCs.

(C) Integrative Genomics Viewer screenshots for common SOX2 peaks at the promoter regions of *HDAC2*, *MCM4* and *MED12* in both hESCs and hNPCs.
