# Supplementary material
Source: PubMed Central journal article supplement (PMC4746607)
Supplement: cr201615x3.pdf [file cr201615x3.pdf]

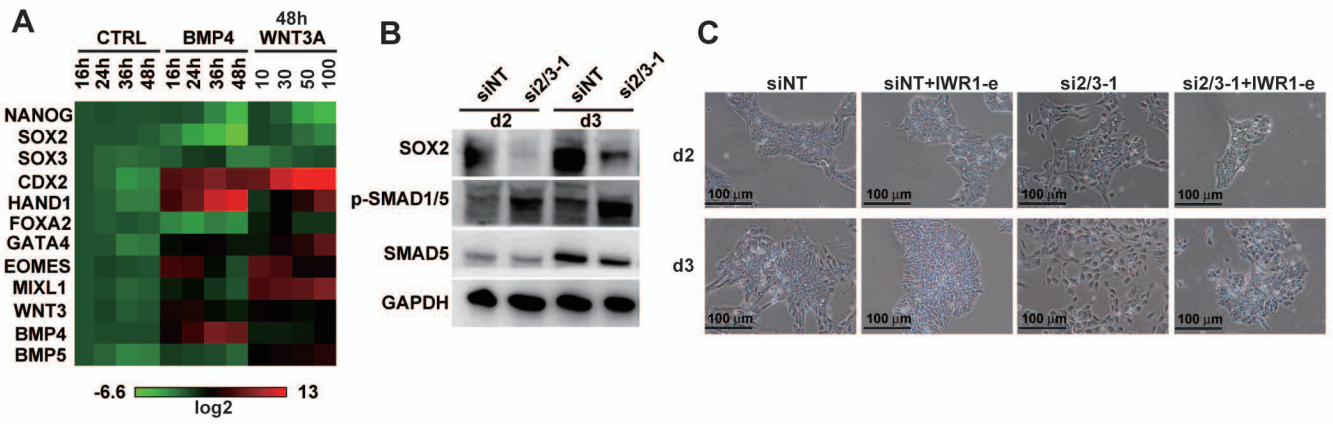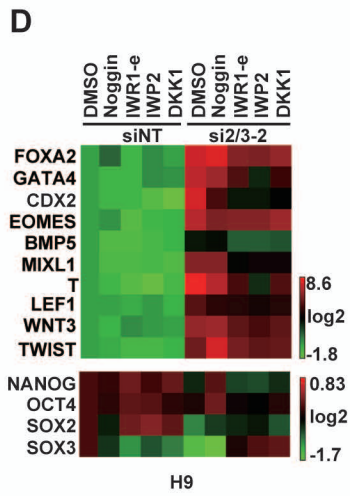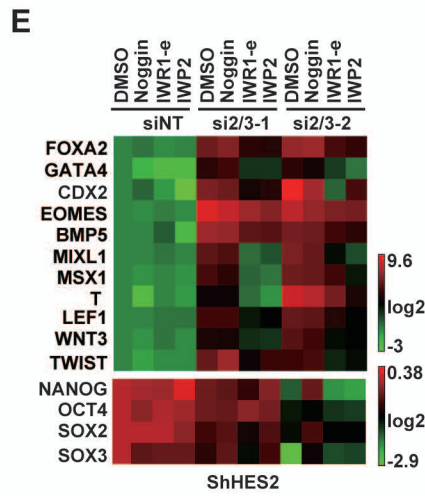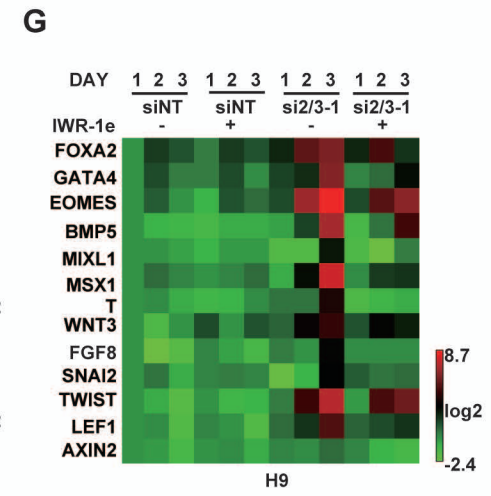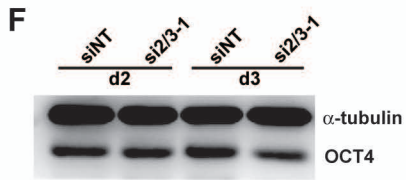

**Figure S3. Knock down of *SOX2* leads to enhanced non-neural lineage**

**differentiation by activating the Wnt pathway. Related to Figure 4.**

(A) RT-qPCR results of lineage and pluripotency markers after BMP4 (50 ng/ml) treatment for 16, 24, 36 and 48 hrs, or with increasing dosages of WNT3A treatment (10, 30, 50 and 100 ng/ml) for 48 hrs in hESCs. Scale bar represents  $\log_2$  of expression levels.

(B) Western blot results of p-SMAD1/5 and total SMAD5 after *SOX2/3* knock down in H9 hESCs at day 2 and day 3.

(C) Morphology of H9 hESCs after *SOX2/3* knock down for 2 days and 3 days.

IWR1-e (10  $\mu$ M) treatment rescues the differentiation phenotype caused by *SOX2/3* KD.

(D and E) RT-qPCR results of pluripotency and lineage markers after *SOX2/3* knock down for 3 days in H9 hESCs using si2/3-2 (D) and in SHhES2 hESCs using si2/3-1 and si2/3-2 (E). DMSO, Noggin (200 ng/ml), IWR1-e (10  $\mu$ M), IWP2 (10  $\mu$ M), DKK1 (100 ng/ml) were used to rescue *SOX2/3* KD caused differentiation. Scale bar represents  $\log_2$  of expression levels.

(F) Western blot for OCT4 protein levels after *SOX2/3* knock down for 2 and 3 days, showing OCT4 protein levels did not decrease till day 3.

(G) RT-qPCR analysis showing increase of lineage markers after *SOX2/3* knock down in H9 hESCs for 1, 2 and 3 days, with the most significant increase occurring on day 3. IWR1-e (10  $\mu$ M) treatment attenuated the increase of lineage markers.
