# Supplementary material
Source: PubMed Central journal article supplement (PMC4746607)
Supplement: cr201615x5.pdf [file cr201615x5.pdf]

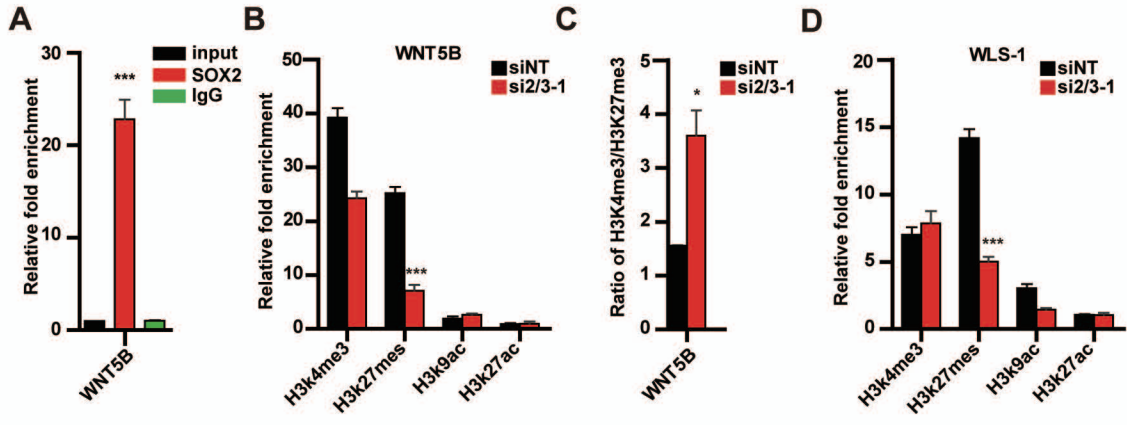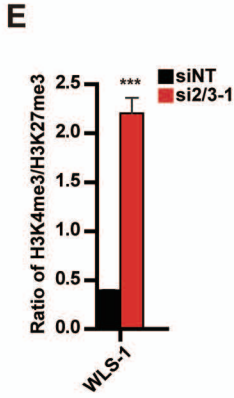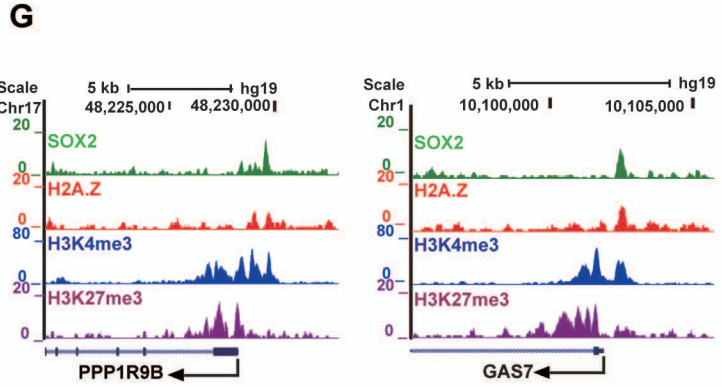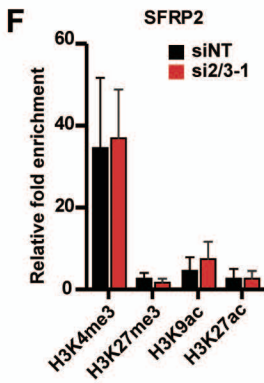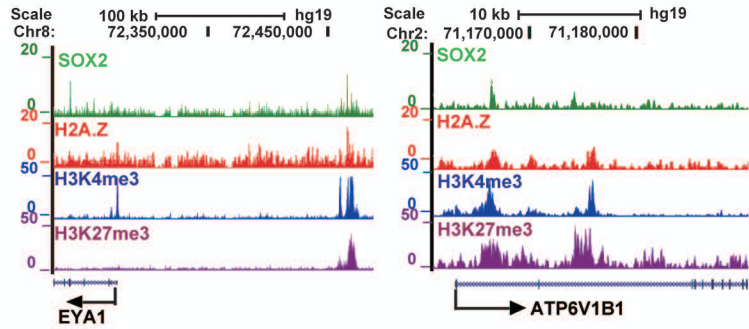

**Figure S5. SOX2 and H2A.Z co-localize to development genes for the establishment of H3K27me3 modification. Related to Figure 7.**

(A) ChIP-qPCR validation of SOX2 enrichments on *WNT5B* in H9 hESCs.

(B) ChIP-qPCR results of histone modification enrichments at SOX2 binding site of *WNT5B* promoter, showing decreased H3K27me3 and unaffected acetylation modification after *SOX2/3* knock down in H9 hESCs.

(C) The ratio of H3K4me3/H3K27me3 at the promoter of *WNT5B* increased after *SOX2/3* knock down in H9 hESCs.

(D) ChIP-qPCR results of histone modification enrichments at SOX2 binding site of the *WLS-1*, showing decreased H3K27me3 and unaffected acetylation modification after *SOX2/3* knock down in H9 hESCs.

(E) The ratio of H3K4me3/H3K27me3 at the *WLS-1* increased after *SOX2/3* knock down in H9 hESCs.

(F) ChIP-qPCR analysis showing the SOX2 binding site at *SFRP2* were mainly methylation modified and unaffected by *SOX2/3* KD.

(G) Integrative Genomics Viewer screenshots for co-localization of SOX2, H2A.Z, H3K4me3 and H3K27me3 on representative developmental genes.
