# Supplementary material
Source: PubMed Central journal article supplement (PMC4746607)
Supplement: cr201615x6.pdf [file cr201615x6.pdf]

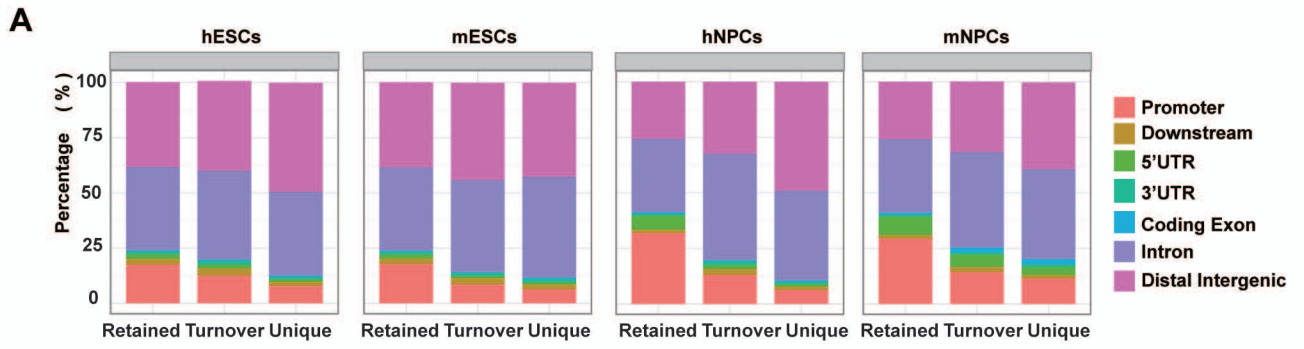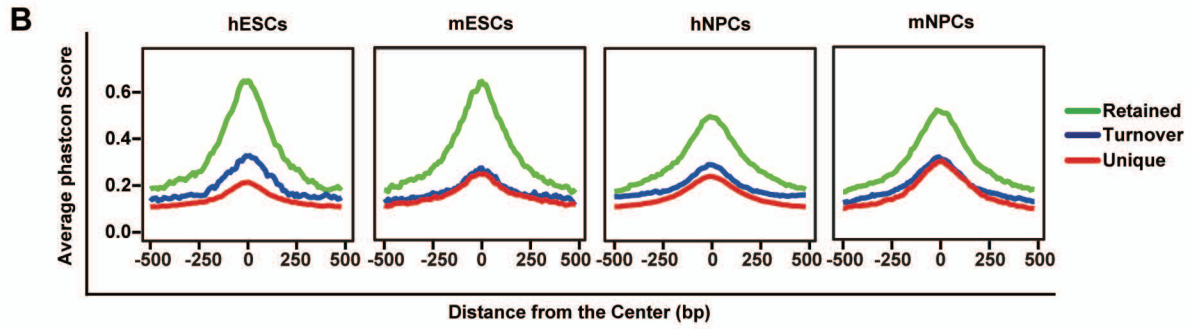

**Figure S6. Species retained SOX2 peaks contain a higher percentage of promoter peaks than turnover or unique peaks. Related to Figure 8.**

(A) Genomic distribution of unique, retained and turnover peaks in ESCs and NPCs of both species.

(B) Average phastcon score was used to determine the level of conservation of unique, retained and turnover peaks in ESCs and NPCs of both species.
